# Supplementary material for: Engineering of cellobiose phosphorylase for the defined synthesis of cellotriose
Source: PubMed Central journal article supplement (PMC7471185; doi:10.1007/s00253-020-10820-8), 2020-08-17
Supplement: 253_2020_10820_MOESM1_ESM.pdf [file 253_2020_10820_MOESM1_ESM.pdf]

Supplementary Material

Applied Microbiology and Biotechnology

**Engineering of cellobiose phosphorylase for the defined synthesis of cellotriose**

Zorica Ubiparip<sup>1</sup>, David Sáez Moreno<sup>1</sup>, Koen Beerens<sup>1</sup>, Tom Desmet<sup>1\*</sup>

<sup>1</sup> Centre for Synthetic Biology (CSB), Department of Biotechnology, Ghent University,  
Coupure Links 653, 9000 Ghent, Belgium

**\* Corresponding author:**

Tom Desmet, Centre for Synthetic Biology

E-mail: [tom.desmet@ugent.be](mailto:tom.desmet@ugent.be)

Website: [www.biocatalysis.ugent.be](http://www.biocatalysis.ugent.be)

Table S1. Primers used for enzyme engineering; mutations are underlined

| Construct      | Template        | Primer Sequences (5'-3')                                 |
|----------------|-----------------|----------------------------------------------------------|
| A291R          | CcCDP wild-type | CATGTTTGGTACCGCG <u>AGG</u> ACCCACGCGATCTTT              |
| A291F          | CcCDP wild-type | GGCATGTTTGGTACCGCG <u>TT</u> CACCCACGCGATCTTTGA          |
| A294H          | CcCDP wild-type | GGTACCGCGGGGACCCACT <u>AT</u> ATATCTTTGAAGATGTGACCT      |
| A294F          | CcCDP wild-type | GTACCGCGGGGACCCACT <u>TT</u> CATCTTTGAAGATGTGACC         |
| Y330A          | CcCDP wild-type | TACCCCGGATTACTATCGTAAGAA <u>AGC</u> CAACGAAGACACCC       |
| Y330R          | CcCDP wild-type | TACCCCGGATTACTATCGTAAGAA <u>ACG</u> CAACGAAGACACCC       |
| K329R          | CcCDP wild-type | CGGATTACTATCGTAAGA <u>G</u> ATACAACGAAGACACCCG           |
| K329A          | CcCDP wild-type | CCCGGATTACTATCGTAAG <u>G</u> CATACAACGAAGACACCCGT        |
| K329W          | CcCDP wild-type | ACCCCGGATTACTATCGTAAG <u>TGG</u> TACAACGAAGACACCCGTTTC   |
| CcCDP_RV1      | CcCDP wild-type | CGAAATAACGCAGCAGCGCTTCCAGCTCTTTTCG                       |
| CcCDP_RV2      | CcCDP wild-type | CGTTGCTGGTCCACTCAAACAGCAGGTTCTTC                         |
| K51R           | CuCBP_OCP2      | TTTTACCGCGATGCAA <u>AG</u> GATGCGTCGGTTGACC              |
| M52W           | CuCBP_OCP2      | TACCGCGATGCAAAG <u>TG</u> GCGTCGGTTGACCCG                |
| M52R           | CuCBP_OCP2      | GCTTTTACCGCGATGCAAAG <u>AG</u> GCGTCGGTTGA               |
| D156W          | CuCBP_OCP2      | TTCGTTGGAGTTTGTCTTATGG <u>TGG</u> GCCCAAGATGATCAGACTGAC  |
| D156K          | CuCBP_OCP2      | CGTGGAGTTTGTCTTATGG <u>A</u> AGGCCCAAGATGATCAGACTG       |
| D156R          | CuCBP_OCP2      | GTGGAGTTTGTCTTATGG <u>G</u> GCGCCCAAGATGATCAGAC          |
| D156Y          | CuCBP_OCP2      | CGTGGAGTTTGTCTTATGG <u>T</u> ATGCCCAAGATGATCAGACTG       |
| G502N          | CuCBP_OCP2      | AACTGCTTTTCCACCACGCCG <u>AA</u> TGAAAGCTTTCAAACCATCGAA   |
| R166Y          | CuCBP_OCP2      | CAAGATGATCAGACTGACTACCA <u>ATA</u> AACCTGAGTATCGGCGAAGTG |
| CuCBP_OCP2_RV1 | CuCBP_OCP2      | TTGCGCTGCCATGAGGACTCTCCTGTTCTAC                          |
| CuCBP_OCP2_RV2 | CuCBP_OCP2      | AGACGCTGACCGACTCATGTAAACGTGAC                            |
| CuCBP_OCP2_RV3 | CuCBP_OCP2      | GGTACGTAGATACGCCGCCATGTGGAC                              |

Table S2. Kinetic parameters towards cellobiose as acceptor<sup>a</sup>

| Enzyme            | $V_{\max}$ (U/mg) | $k_{\text{cat}}$ (s <sup>-1</sup> ) | $K_m$ (mM) | $k_{\text{cat}}/K_m$ (M <sup>-1</sup> s <sup>-1</sup> ) |
|-------------------|-------------------|-------------------------------------|------------|---------------------------------------------------------|
| CcCDP (wild-type) | 10.4              | 19.3                                | 16.8       | 1149                                                    |
| CcCDP_A294F       | 0.35              | 0.6                                 | 1.3        | 461                                                     |
| CcCDP_A294H       | 0.17              | 0.3                                 | 2.2        | 136                                                     |
| CcCDP_A291R       | 3.9               | 7.2                                 | 27.2       | 265                                                     |
| CcCDP_A291F       | 5.1               | 9.5                                 | 18.3       | 519                                                     |
| CcCDP_K329R       | 0.5               | 0.9                                 | 4.3        | 209                                                     |
| CcCDP_K329A       | 3.7               | 6.9                                 | 5.7        | 1210                                                    |
| CcCDP_K329W       | 0.5               | 0.9                                 | 4.2        | 214                                                     |
| CcCDP_Y330A       | 0.6               | 1.1                                 | 2.5        | 44                                                      |
| CcCDP_Y330R       | 0.7               | 1.3                                 | 10.5       | 124                                                     |

<sup>a</sup> Using 50 mM  $\alpha$ G1-*P* as co-substrate in 100 mM MES buffer, at pH 7 and 55 °C
